## **Bacterial quorum sensing allows graded and bimodal cellular responses to variations in population density**

Jennifer B. Rattray<sup>1,2</sup>, Stephen A. Thomas<sup>1,2,3</sup>, Yifei Wang<sup>1,2,4</sup>, Evgeniya Molotkova<sup>1</sup>, James Gurney<sup>1,2</sup>, John J. Varga<sup>1,2</sup>, Sam P. Brown<sup>1,2</sup>

<sup>1</sup> School of Biological Sciences, Georgia Institute of Technology, Atlanta, 30332 GA, USA

<sup>2</sup> Center for Microbial Dynamics and Infection, Georgia Institute of Technology, Atlanta, 30332 GA, USA

<sup>3</sup> Graduate Program in Quantitative Biosciences (QBioS), Georgia Institute of Technology, Atlanta, 30332 GA, USA

<sup>4</sup> The Institute for Data Engineering and Science (IDEaS), Georgia Institute of Technology, Atlanta, 30332 GA, USA

Corresponding author: Sam P. Brown

**Email:** [sam.brown@biology.gatech.edu](mailto:sam.brown@biology.gatech.edu)

ORCIDiDs. Jennifer B. Rattray <https://orcid.org/0000-0003-3478-2242>; Stephen A. Thomas <http://orcid.org/0000-0003-0773-0236>; Yifei Wang <http://orcid.org/0000-0002-7510-7959>, James Gurney <http://orcid.org/0000-0002-8364-3380>, John J. Varga <https://orcid.org/0000-0002-4868-1971>

### **Keywords**

Bacterial communication, quorum sensing, sociomicrobiology, reaction norm

### **Author Contributions**

J.B.R and S.P.B. conceived the idea and designed the experiment; J.B.R., E.M., J.G., and J.J.V. performed the experiments; J.B.R analyzed the data; and J.B.R., S.A.T, Y.W., J.G., J.J.V., and S.P.B. wrote the paper.

## 1 **Abstract**

2 Quorum sensing (QS) is a mechanism of cell–cell communication that connects gene expression  
3 to environmental conditions (e.g. density) in many bacterial species, mediated by diffusible signal  
4 molecules. Current functional studies focus on a dichotomy of QS on/off (or, quorate / sub-  
5 quorate) states, overlooking the potential for intermediate, graded responses to shifts in the  
6 environment. Here, we track QS regulated protease (*lasB*) expression and show that  
7 *Pseudomonas aeruginosa* can deliver a graded behavioral response to fine-scale variation in  
8 population density, on both the population and single-cell scales. On the population scale, we see  
9 a graded response to variation in environmental population density. On the single-cell scale, we  
10 see significant bimodality at higher densities, with separate OFF and ON sub-populations that  
11 respond differentially to changes in density; static OFF cells and increasing intensity of  
12 expression among ON cells. While the QS-controlled behavioral output is graded, the underlying  
13 multi-signal dynamics display a threshold shift in signal concentration with increasing density,  
14 reflecting the onset of positive signal auto-regulation at intermediate densities. Together these  
15 results indicate that QS can tune gene expression to graded environmental change, with no  
16 critical cell mass or ‘quorum’ at which behavioral responses are activated on either the individual  
17 cell or population scale. In an infection context, our results indicate there is not a hard threshold  
18 separating sub-quorate ‘stealth’ mode and a quorate ‘attack’ mode.

19

## 20 **Main Text**

### 21 **Introduction**

22 Many species of bacteria are capable of a form of cell-cell communication via diffusible signal  
23 molecules, generally referred to as quorum sensing (QS). The study of QS has largely focused on  
24 the intracellular gene regulatory scale, leading to a detailed understanding of the regulatory  
25 mechanisms shaping the production of and response to signal molecules in model organisms  
26 such as *Vibrio cholerae*, *Bacillus cereus* and *Pseudomonas aeruginosa* (1–3). We now  
27 understand that QS is mediated by multiple diffusible signals that together control a diverse array  
28 of responses, including swarming, luminescence, competence and the production of diverse  
29 secreted factors (4, 5)

30

31 While the molecular mechanisms of QS have been described for model organisms in remarkable  
32 detail, the functional and evolutionary context of QS continues to be disputed. In other words,  
33 while we now have a better understanding of *how* QS works, we still have limited understanding  
34 of *why* bacteria use this system to control behavior. What are the functions of QS? How do these  
35 QS functions help bacteria to survive and grow? The standard answer is that bacteria use QS to

36 sense when they are at sufficient density ('quorate') to efficiently turn on cooperative behaviors  
37 such as secretion of toxins and enzymes in order to collectively modify their environment (6).  
38 Other researchers have argued that QS is an asocial sensing apparatus, where individual cells  
39 produce and monitor signal levels in order to infer their physical environment (am I in an open or  
40 enclosed space?) (7). More recently, integration of molecular and evolutionary approaches has  
41 increased the menu of potential functions to include sensing multiple aspects of both the social  
42 and physical environment (6, 8–10) and coordinating complex social strategies that limit the  
43 profitability of non-cooperating 'cheat' strains (11–18).

44  
45 A critical step in assessing the various adaptive hypotheses is establishing the functional  
46 capacities and limits of QS. Previous studies have demonstrated 'density sensing' functions –  
47 populations can use QS to sense when they exceed a density threshold (6, 19, 20). In addition,  
48 Darch et al. (2012) demonstrated that responding with increased QS controlled cooperative  
49 activity at high density can provide a fitness benefit (6). Other studies have demonstrated  
50 'diffusion sensing' functions (7) – QS systems can functionally respond to variation in physical  
51 containment, so that even a single cell can become 'quorate' (turn on a QS controlled reporter  
52 gene) if isolated in a sufficiently small contained space (9). More recently, some studies have  
53 demonstrated 'genotype sensing' functions – QS can respond to variation in the genotypic  
54 composition of a population, restricting QS-controlled responses to populations that are enriched  
55 with wildtypes (11, 14, 21, 22).

56  
57 The functional studies outlined above largely focus on a dichotomy of QS on/off (or, quorate /  
58 sub-quorate) states, overlooking the potential for intermediate, graded responses (Fig 1A). The  
59 threshold quorate/non-quorate concept is ingrained in the QS literature following the use of the  
60 legal 'quorum' analogy (20), and is also supported by mathematical models of QS signal  
61 dynamics that highlight how sufficiently strong positive feedback control of signal production can  
62 produce a sharp threshold response to changes in environmental parameters such as density or  
63 diffusion (23, 24). However, these same mathematical models indicate that graded responses are  
64 also possible, dependent on the model parameterization. More generally, Fig 1A highlights that  
65 the phenotypic response of QS bacteria to differing environmental conditions can be viewed as a  
66 'reaction norm' (25–28) that can in principle take differing shapes. Reaction norms describe  
67 phenotypic responses of a single genotype (y-axis, Fig 1A) to varying environmental inputs (x-  
68 axis, Fig 1A). Incorporating a reaction norm framework provides a menu of quantitative metrics to  
69 define QS responses to environmental variation (e.g., slope, intercept, and variances). With this  
70 reaction norm framework, it is important to emphasize that in our study the x-axis is not time, but  
71 instead captures a gradient of environmental conditions. Whether responses are graded or  
72 thresholded during the growth towards high density is a separate line of inquiry (29). Describing

73 the reaction-norms of QS cells and populations to contrasting environments is an important step  
74 towards understanding the capacities of QS systems to differentially respond to novel  
75 environments.

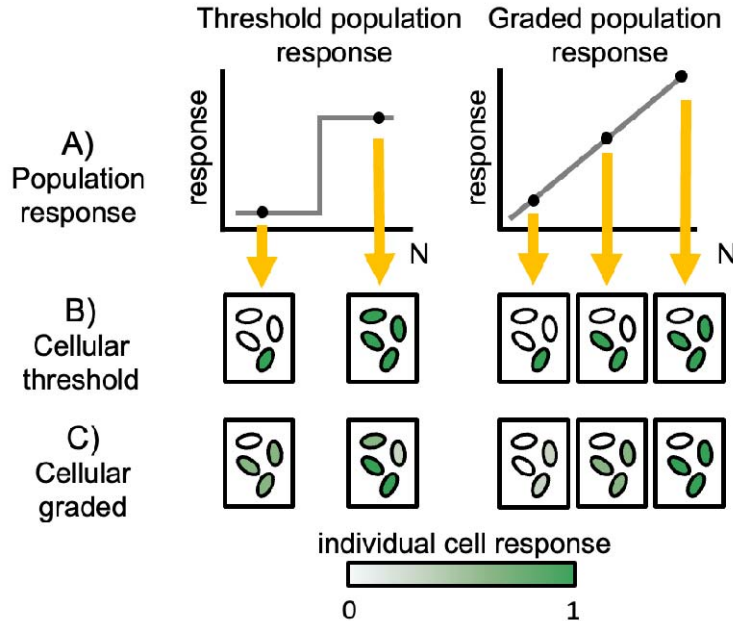

76

77 **Figure 1. Schematic of potential population and single cell responses to variation in cell density.** A)  
78 Population response (y-axis) across discrete carrying capacity environments (N, x-axis), given a threshold  
79 (left) or graded response (right). In (B) and (C) we outline alternative cell-scale responses (intensity of green  
80 cells) that are consistent with discrete population scale behaviors (yellow arrows). (B) threshold (ON/OFF)  
81 cellular responses can produce a threshold or graded responses on population scale. (C) graded individual  
82 responses can produce threshold or graded responses on a population scale.

83 Whether the population scale reaction norm to environmental variation is threshold-like or graded  
84 (Fig 1A), a separate question is how collective population-level responses are constructed out of  
85 individual cellular contributions (Fig 1B,C). Studies of QS on a single-cell scale have revealed  
86 substantial heterogeneity in response to QS signals (9, 30–36), highlighting that cell-cell  
87 communication does not necessarily result in tight synchronization of individual cell activity (Fig  
88 1B,C). In some systems, heterogeneity can be quenched by the addition of extra signal (31, 33),  
89 implying a lack of receptor saturation. However, this is not a universal result (30), indicating that  
90 other molecular processes can drive cellular variation in response. Regardless of the molecular  
91 details, we currently lack a behavioral understanding of how individual cellular responses vary  
92 with changes in the environment.

93

94 In the current study we address the canonical ‘density sensing’ function of QS, using the  
95 environmental generalist and opportunistic pathogen *Pseudomonas aeruginosa*, and an

96 unprecedented scale of environmental resolution (13 discrete limiting carbon levels conducted in  
97 triplicate, generating 39 density environments). Our first challenge is to map the population scale  
98 resolving power of QS to quantitatively discriminate graded differences in population density (Fig  
99 1A). Does *P. aeruginosa* respond in a purely threshold manner, collapsing quantitative  
100 differences in population density into a simple low / high qualitative output, or can QS allow *P.*  
101 *aeruginosa* to deliver a graded response to distinct environmental densities? Our second  
102 challenge is to understand how collective responses are partitioned across individual cells. Are  
103 changes in collective responses governed primarily by changes in the proportion of cells in an on  
104 state (Fig 1B) or changes in the individual cell intensity of response (Fig 1C), or both?

105

106

## 107 **Results**

108 **Collective level of response to density is graded and linear.** Our first challenge is to map out  
109 the population scale reaction norm of the collective QS-controlled protease (*lasB*) response to  
110 variation in population densities. To provide a detailed picture of the QS response reaction norm  
111 to varying density, we grew a QS reporter strain (PAO1 pMHLAS containing the *PlasB::gfp(ASV)*  
112 reporter construct for QS regulated protease expression (37)) under 13 conditions of carbon  
113 limitation in triplicate and measured average fluorescence output per cell as the populations  
114 reach carrying capacity (Fig 2). Dead cells with compromised membranes were identified with a  
115 propidium iodide stain and excluded from analysis. The range of cell densities generated from  
116 this method is from  $1 \times 10^8$  cells/ml to  $2 \times 10^9$  cells/ml. Figure 2 shows that QS response is linear  
117 with increasing culture density, providing intermediate levels of average per-capita response to  
118 intermediate densities. To confirm the lack of threshold behavior we assessed alternate statistical  
119 models including threshold functions, and found that a linear fit model supports the data better  
120 than a step-function fit (AIC linear: 89, AIC step-function: 190; relative likelihood that the linear  
121 model is the best fit compared to step-function  $> 10^9$ , see (38)), supporting a graded population  
122 response as outlined in Figure 1. This agrees with literature that QS induction at lower population  
123 densities is possible (6, 9, 19), but differs in that there is no observable population density at  
124 which populations ‘switch’, or reach quorum, into a responsive state.

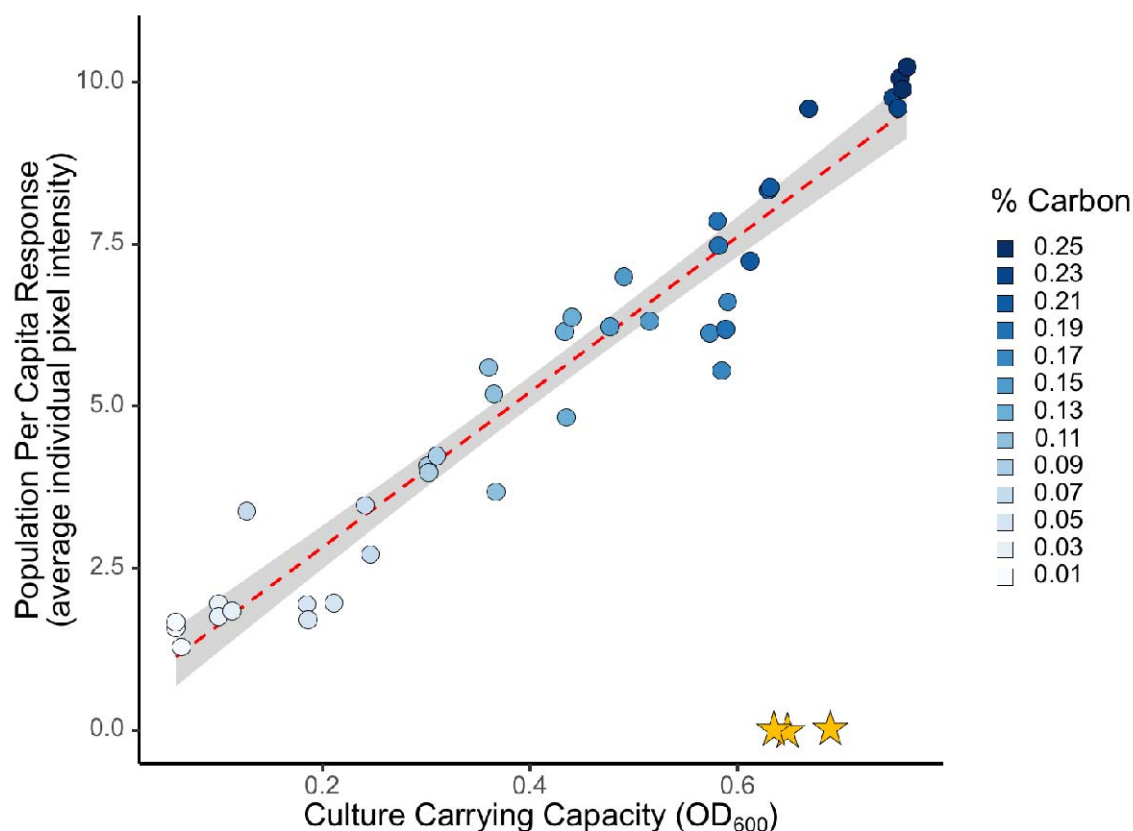

125

126 **Figure 2. Population response to increasing cell density is linear and graded.** 13 distinct culture  
127 carrying capacities were generated by manipulating the concentration of casein as the limiting resource (Fig  
128 S1). Cells were grown to carrying capacity in triplicate and immediately assayed for QS response via  
129 fluorescence microscopy imaging. Response is determined by a fusion of the quorum sensing controlled  
130 *lasB* promoter and an unstable green fluorescent protein (PAO1 pMHLAS containing *PlasB::gfp(ASV)*).  
131 Individual cell pixel intensity is a measure of cellular quorum sensing response and average pixel intensity is  
132 calculated across all cells in the population as a proxy for total population expression. Microscopy averages  
133 are congruent with population scale plate reader results (Figure S2). A quorum sensing signal knockout  
134 ( $\Delta lasI\Delta rhII$ ), yellow star, shows background response with no signal in the environment. Average population  
135 investment in QS increases as culture density increases with no observable density threshold (AIC linear:  
136 89, AIC step-function: 190).

137

138 **Individual response to density is bimodal at high densities.** Figure 2 establishes that on a  
139 collective population scale, the response to environmental variation (in density) is smoothly  
140 graded. Next, we ask how this collective response is built from individual cell contributions. Is the  
141 graded increase due to more cells turning on at higher densities (Figure 1B), cells turning on to a  
142 greater extent (Figure 1C), or both? To address this question, we take the same data presented

143 in Figure 2 and now present the distribution of individual cellular responses rather than simply the  
144 mean response (Figure 3).  
145

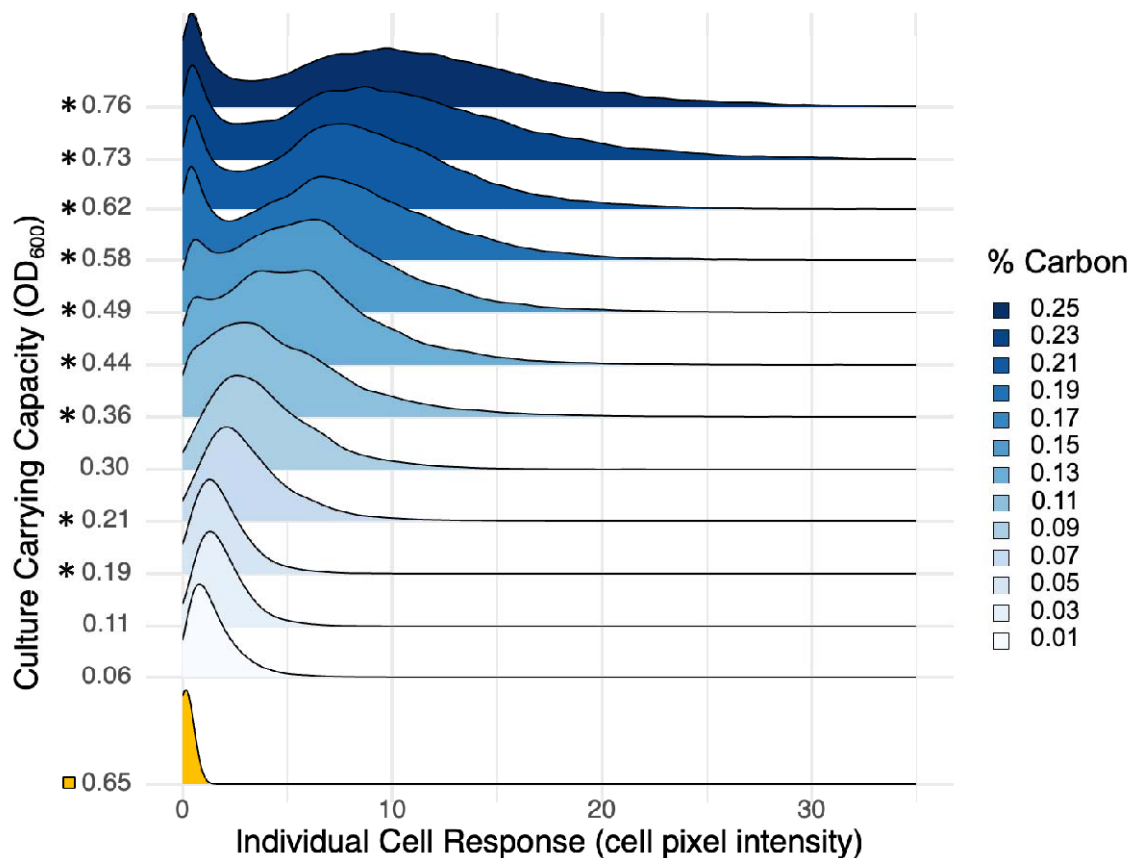

146  
147 **Figure 3. Individual response is heterogeneous and bimodal at higher densities.** Ridgeline density plot  
148 (bandwidth = 0.435) of single-cell *lasB* reporter response data showing the distribution of individual cell QS  
149 expression across the population. For brevity and plotting purposes, carrying capacities were averaged  
150 across 3 replicates for each of the 13 carbon environments before plotting. A full plot of each independent  
151 replicate environment can be found in Figure S3. Each line summarizes 18,000 to 30,000 individual cell  
152 measurements, scaled to a unit height. Asterisks indicate significant bimodality (Hartigan's Dip Test (39),  
153 Figure S4). The quorum sensing signal knockout ( $\Delta lasI\Delta rhII$ ) is denoted with yellow boxes. A total of  
154 345,000 individual cell measurements were analyzed.

155  
156 As expected from prior studies in other QS systems (9, 30–36), plotting all individual responses  
157 within a population shows cell-to-cell variation in QS response within a single population despite  
158 isogenic and homogenous culture conditions (Figure 3). In addition, at higher densities we see  
159 significant bimodality (defined by Hartigan's Dip Test, Figure S4), with the population segregating  
160 into an unresponsive, sub-quorate, OFF state and a responsive, quorate, ON state.  
161

162 In light of this bimodality, we fit a two-component finite mixture model to the data (Figure 4A, see  
163 Figures S10-S13 and Table S2 for extended analysis), which allows us to define the average  
164 intensity of the ON state (Figure 4B) and the proportion of cells in the OFF or ON states (Figure  
165 4C).

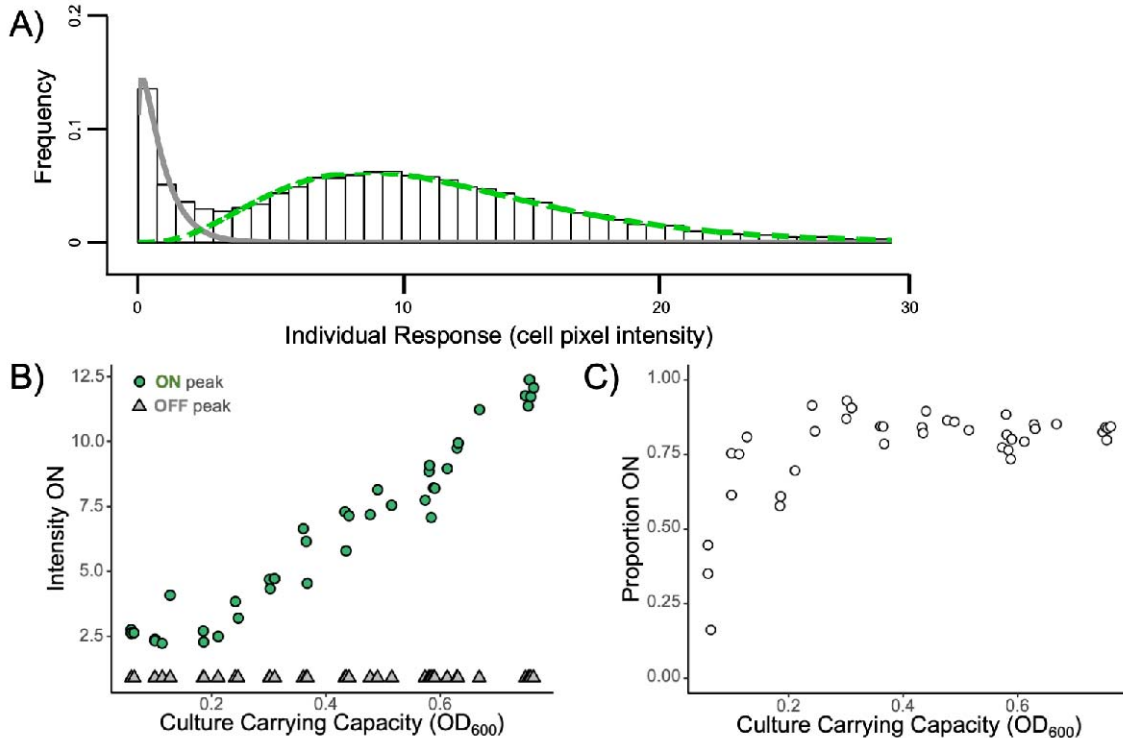

166 **Figure 4. Proportion of cells responding and level of response varies with density.** In light of the  
167 bimodal responses in Figure 3, we coarse-grain the single-cell *lasB* response data into discrete ON/OFF  
168 states. A) Method summary. We quantify distinct ON/OFF states by fitting a two-component finite mixture  
169 model at each measured optical density, where the OFF state is fixed to the OFF state of the highest density  
170 environment. The histogram shows the distribution of cellular expression levels at a single density treatment  
171 (0.76 OD<sub>600</sub>), the grey line is the fitted OFF state and the green dashed line is the fitted ON state. B) The  
172 mean intensity of the ON (green circle) and OFF (grey triangle) states is determined from the means of  
173 mixture model component fits (green and grey lines in panel A). The mean intensity of the ON state  
174 distribution increases as culture density increases, while the mean of the OFF state remains constant. C)  
175 The proportion of cells ON in the population is determined from the relative mass of cells in the model  
176 component fits. The proportion ON increases with culture density but does not reach 100%.

177  
178  
179 Figure 4B illustrates a graded linear increase in the intensity of the ON state with increasing  
180 environmental density, and a density-invariant off state. Figure 4C illustrates that the proportion of  
181 cells that are ON plateaus at around 85% at densities with consistent support for bimodality  
182 (above 0.36 OD<sub>600</sub>). At lower densities, the intensity of the ON state (Figure 4B) declines to a  
183 point where the OFF and ON states are no longer significantly different and the dip test fails to  
184 reject uni-modality (Figure S4). In supplemental materials, we present alternate statistical



185 analyses of this data, and of other related datasets. Across other experiments, we find consistent  
186 support for the graded and bimodal response pattern on the single-cell scale across multiple  
187 assay time-points (Figure S5) and across two reporter strain constructs (Figure S6) and support  
188 for the graded and linear response pattern on the population scale across fluorescent and lux  
189 reporters (Figure S2, Figure S7). We find further support for the graded reaction norm on the  
190 population scale across two additional QS controlled genes (*pqsA*, *rhII*; Figure S7).

191

192 As quorum sensing is a signal mediated behavior, we sought to connect these behavioral results  
193 with the underlying signaling dynamics in the environment. QS in *Pseudomonas aeruginosa* is  
194 heavily studied in a high-density context, revealing a complex mechanism of multi-signal control  
195 (40–42). The *P. aeruginosa* QS system is dominated by the acyl-homoserone lactone (AHL)  
196 signaling systems LasI/R and RhII/R (40, 43). Each of these signaling systems codes for a signal  
197 synthase (LasI, RhII), which guide the production of a diffusible AHL signal molecule (3-oxo-C12  
198 HSL, C4-HSL) at an initially basal level. Binding of each signal to its cognate receptor (LasR,  
199 RhIR) results in an active transcriptional factor which can up-regulate cognate synthase activity  
200 (signal auto-induction) along with other genes in the QS regulon. For more details on the  
201 complexities of *P. aeruginosa* QS wiring, see (44–47).

202

203 In light of this established mechanistic understanding of high-density behavior, we outline three  
204 alternate hypotheses for the reaction norms of multi-signal concentrations on density: (1) First,  
205 under a null model of no autoinduction, we predict a linear increase in signal concentration,  
206 reflecting a constant (baseline) per-capita signal production. (2) Second, under a threshold model  
207 for the onset of autoinduction we predict a piecewise linear reaction norm, with a steeper slope in  
208 the higher density environment (reflecting higher per-capita signal production following a  
209 threshold onset of auto-induction). (3) Third, under a graded onset model, we predict a smoothly  
210 accelerating reaction norm, with the slope at a given density reflecting the graded degree of onset  
211 of autoinduction.

212

213 To test these hypotheses, we measured the environmental concentration of 3-oxo-C12 HSL and  
214 C4-HSL from previous experiments (at the time point of QS response assays, Figure 3) using *E.*  
215 *coli* biosensors (48) (Figure 5). To discriminate among the three explicit models, we fit multiple  
216 alternate models to the data and compared their goodness of fit using information criteria. (Figure  
217 5; Tables S3-S5 and Figures S14-S15). A linear fit, representing no positive signal auto-  
218 regulation, is the worst of the models considered for both 3-oxo-C12 HSL and C4 HSL data.  
219 Further statistical tests provide additional evidence for a non-linear relationship (Table S5). In  
220 Figure 5, we show model fits for the best fitting continuously accelerating functions alongside a  
221 threshold model fit. Evaluating these two models via AICc values (corrected AIC to account for

222 smaller datasets (38)) we find that the threshold model is the best supported model for both the 3-  
223 oxo-C12 HSL and C4 HSL data (Figure 5, inset). More specifically, we can assess the strength of  
224 support for the threshold model via the relative likelihood versus the next-best exponential model  
225 (38). For the C4 HSL data, we find the threshold model has 14-fold greater support, and for the 3-  
226 oxo-C12 HSL data, the threshold model has 8-fold greater support (Table S5). This analysis  
227 indicates there is a critical intermediate density that triggers an abrupt shift in the extent of signal  
228 auto-regulation, separating a basal signal regime from a higher density auto-regulated regime.  
229

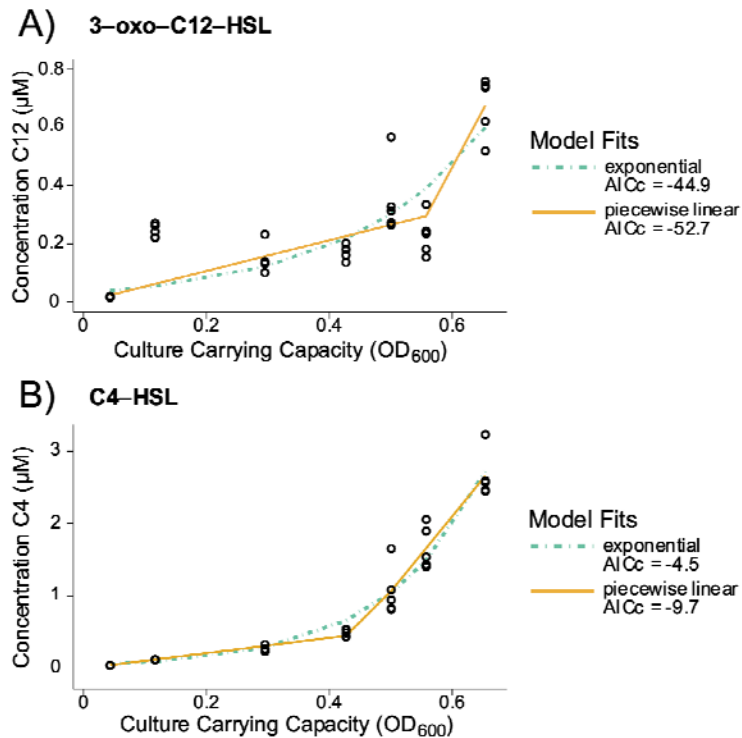

230  
231 **Figure 5. 3-oxo-C12 HSL and C4 HSL concentration increases in a threshold (piecewise linear)**  
232 **manner with increasing density.** Signal environment was characterized using filtered culture supernatant  
233 (extracted at the same timepoints as for the gene expression data in Figure 3) and *E. coli* biosensors (48).  
234 Model fits are based on nonlinear least squares estimates. Model performance was assessed via AICc (see  
235 figure insets and Table S5). See Tables S3-S5 and Figures S14-S15 for statistical analysis details.  
236

## 237 Discussion

238 Our results show that populations of *P. aeruginosa* can respond in a smoothly graded manner to  
239 variation in environmental density (Figure 2), and that populations exhibit significant bimodality at  
240 higher densities (Figure 3), and that this population scale graded response can be described by  
241 the number of responsive 'ON' cells and the intensity of the 'ON' state (Figure 4). Turning to the  
242 underlying signal mechanics, we further illustrate a threshold onset of signal auto-induction at

243 intermediate densities (Figure 5). The ability to achieve a graded population scale response  
244 implies in principle that *P. aeruginosa* can tune collective responses (such as the secreted  
245 elastase virulence factor produced by our *lasB* reporter gene) to graded environmental changes,  
246 rather than simply course-graining into a simple ‘high / low’ dichotomy. A similar population scale  
247 graded response to continuous environmental variation is visible in the data from Allen et al.,  
248 which looked at variation in the genotypic composition of mixed populations grown to the same  
249 total density (11). As the proportion of wildtype (PAO1 versus  $\Delta lasR$  ‘cheats’) increased, the  
250 wildtype per-capita investment in cooperative LasB secretions also increased, providing a simple  
251 behavioral mechanism to protect cooperative investments from exploitation by cheats (11, 22).

252

253 The existence of graded population scale responses across two continuously varying  
254 environmental inputs (density, genotypic composition) raises the question of why use a graded  
255 response? Is there an evolutionary rationale for a graded response, or is a graded increase  
256 simply the ‘best approximation’ of a threshold response, given a simple system working under  
257 genetic constraints? Existing evolutionary theory suggest that graded investment reaction norms  
258 can be adaptive, under a range of distinct scenarios (49, 50) (34, 35). In the specific context of  
259 quorum-sensing bacteria, evolutionary theory suggests that population scale responses to  
260 increasing density should depend critically on the shape of the cost and benefit functions of  
261 increasing cooperative investments. Specifically, a graded response is predicted to be the optimal  
262 strategy if the benefit function is decelerating and costs are linear with increasing investment (51).

263

264 To further consider the functional context of the graded reaction norms, we turn to the single cell  
265 scale data, which reveals how the graded population response is built from the contributions of  
266 individual cells. In agreement with previous work in multiple quorum-sensing organisms (9, 30–  
267 36, 52, 53), we find cell-scale heterogeneity. In addition, our results illustrate how cellular  
268 heterogeneity changes with the environment, demonstrating the onset of ON/OFF bimodality at  
269 intermediate densities, with both the proportion of cells ON and the intensity of the cellular ON  
270 states increasing with increases in culture carrying capacity (Figures 3 & 4).

271

272 The presence of a bimodal QS response is in contrast with the common view of QS as a  
273 mechanism of cell synchronization yet can be viewed as a striking example of widely observed  
274 cellular heterogeneity under QS control. Indeed, bimodal responses are implicit in some of the  
275 previous single-cell QS literature (31, 32, 53), for example Darch et al. (2018) report distinct  
276 populations of QS-responsive and non-responsive cells within single experimental runs (53). The  
277 degree of heterogeneity in any cellular trait can be interpreted as the interplay of biochemical  
278 properties of molecules and the architecture of gene-regulatory networks (54). Given that  
279 regulatory networks are subject to mutation and selection, this implies that the degree of

280 heterogeneity is an evolvable trait (55). In the context of QS, positive feedback loops (signal auto-  
281 regulation (56)) and the presence of cooperative transcription factor binding (57) provides  
282 recognized regulatory ingredients for bimodal expression (58). Recently, the presence of  
283 heterogeneous QS response at the single-cell scale has been ascribed to a potential bet-hedge  
284 against mis-directed QS induction (52), suggesting that our OFF cells are poised to more quickly  
285 resume growth in the event of a rapid return to a growth-friendly environment.

286

287 We made a number of specific observational choices in order to conduct our experiment that  
288 could have shaped our results in ways that are not generalizable to other contexts. In the  
289 supplementary we detail a number of additional experiments (and alternate statistical analysis  
290 approaches) that collectively illustrate the robustness of our findings. In brief, we found that our  
291 single cell results are not sensitive to the time the population was sampled (Figure S5), the  
292 presence of a potentially leaky *Plac::lasR* on the pMHLAS construct (Figure S6), or the plasmid  
293 nature of the pMHLAS construct (Figure S6). Additionally, we recognize that *lasB* is only one  
294 gene out of hundreds that are controlled by QS (3), and is often co-regulated by other factors  
295 (59–61). We chose to initially focus on *lasB* as it is a traditionally studied QS-controlled trait (62–  
296 64) that has clinical significance as a virulence factor (65, 66). To begin to address the generality  
297 of our results across genes in *P. aeruginosa*, we show that two other QS regulated genes with  
298 complex promoters, *pqsA* and *rhII*, also support a graded population response (Figure S7). It  
299 remains to be seen whether the graded responses we report here are consistent across all QS  
300 controlled genes in *P. aeruginosa*, and across QS systems in other species,

301

302 A recent transcriptomic analysis of clinical versus *in vitro* gene expression in *P. aeruginosa* called  
303 into question the clinical relevance of *in vitro* models of QS, reporting that QS activity (including  
304 *lasB* expression) was systematically higher in *in vitro* models (67). Our results provide a simple  
305 interpretation of this difference: *in vitro* models are conducted under higher experimental  
306 densities, resulting in higher levels of average QS gene expression (Figure 2). Consistent with  
307 this graded response interpretation, Cornforth et al. (2018) also reported higher levels of relative  
308 expression in *in vitro* biofilm models (close-packed cells, the highest local density achievable)  
309 compared to *in vitro* planktonic models.

310

311 In summary, our results provide a finely resolved mapping of the QS reaction norm to  
312 environmental density in PAO1, on both the collective and single-cell scale. On the population  
313 scale we see a graded linear response across a range of cellular densities ( $1 \times 10^8$  cells/ml to  
314  $2 \times 10^9$  cells/ml) and significant individual-scale bimodality at higher densities. We further resolve  
315 this linear population response (Figure 2) into a combination of the likelihood of being responsive  
316 and the intensity of response (Figure 4). The underlying signal dynamics support a threshold

317 onset of signal auto-induction at intermediate densities, leading to increased levels of QS signal  
318 production (Figure 5). In an infection context, our results indicate that there is no hard threshold  
319 separating sub-quorate 'stealth' mode and a quorate 'attack' mode (68). One implication is that  
320 attempts to control virulence and biofilm expression in medicine and industry via QS inhibition  
321 could have impacts across a wider spectrum of population densities. In this applied context, it is  
322 important to assess the generality of our results and ask, how do QS reaction-norms vary across  
323 strains and species of QS bacteria? How do they vary across environments? More broadly, our  
324 work undermines the threshold concept of a 'quorum', instead placing QS bacteria in the graded  
325 world of reaction norms.

326

327

## 328 **Materials and Methods**

329 **Bacterial Strains and Growth Conditions.** The two main bacterial strains used in this study are  
330 *P. aeruginosa* NPAO1 (Nottingham-PAO1) containing the *PlasB::gfp(ASV)* quorum sensing  
331 reporter pMHLAS (37) and a double signal synthase mutant incapable of producing QS signal  
332 molecules, *P. aeruginosa* NPAO1  $\Delta las/\Delta rhII$  containing the same *PlasB::gfp(ASV)* quorum  
333 sensing reporter pMHLAS. A complete table of strains used in the main text and supplemental  
334 figures can be found in Supplemental Table 1. Overnight cultures were grown in lysogeny broth  
335 (LB), supplemented with 50 ug/ml gentamicin to maintain the pMHLAS plasmid, with shaking at  
336 37 °C. Experiments were conducted in lightly buffered (50 mM MOPS) M9 minimal defined media  
337 composed of an autoclaved basal salts solution ( $\text{Na}_2\text{HPO}_4$ , 6.8  $\text{gL}^{-1}$ ;  $\text{KH}_2\text{PO}_4$ , 3.0  $\text{gL}^{-1}$ ; NaCl, 0.5  
338  $\text{gL}^{-1}$ ), and filter-sterilized 1 mM  $\text{MgSO}_4$ , 100  $\mu\text{M}$   $\text{CaCl}_2$ , and 1X Hutner's Trace Elements with  
339 casein (CAA) as the sole carbon source.

340

341 **Controlling Culture Carrying Capacity.** We manipulated density by controlling the limiting  
342 resource in the media, carbon, allowing us to tune the carrying capacity of each treatment (Figure  
343 S1). To cover a variety of densities, we generated a CAA range between 0.05% and 0.25% via  
344 dilutions of a 0.5% CAA minimal media stock for a total of 13 different carrying capacities with  
345 three replicates each. This produced a range of densities environments from  $1.18 \times 10^8$  cells/ml to  
346  $2.02 \times 10^9$  cells/ml. Overnight cultures were grown in LB gentamicin 50 ug/ml and centrifuged at  
347 8,500 x g for 2 minutes. The cells were then washed twice with carbonless minimal media and  
348 then each carbon treatment was adjusted to  $\text{OD}_{600} = 0.05$ . Then, 200  $\mu\text{L}$  of each sample was  
349 added to a 96-well microplate. Plates were incubated with continuous shaking at 37 °C in a  
350 Cytation/BioSpa plate reader and growth curves were generated by absorbance readings taken  
351 at 30-min intervals.

352

353 **Measuring Population QS Response.** To measure population response, we performed growth-  
354 curve experiments as previously described using PAO1 *PlasB::gfp(ASV)*, additionally taking  
355 fluorescence readings at 30-min intervals. Fluorescence, population level response, was  
356 recorded when populations reached the end of their exponential growth phase, before they  
357 entered stationary phase. Controls for background fluorescence of the reporter were done with  
358 the QS signal deficient mutant PAO1  $\Delta lasI/\Delta rhII$  *PlasB::gfp(ASV)*. The population microplate data  
359 (Figure S2) and averaged microscope data (Figure 2) agreed, so the latter is provided in the  
360 primary text.

361  
362 **Measuring Individual QS Response.** To measure individual response, we performed growth-  
363 curve experiments as previously described, but removed samples for microscopy once cells  
364 reached end exponential phase. Since we control carrying capacity with the amount of carbon,  
365 the exact time that cells reach the end of exponential growth differs across treatments by 2-3  
366 hours. To robustly sample cultures at this specific point, the slope of the two most recent time  
367 points on the growth curve was monitored and samples were taken as the slope approached 0.  
368 Replicate wells were kept growing to confirm that the treatment entered stationary phase right  
369 after the sampling time point. We also determined that our results are generalizable even when  
370 sampling at a pre-determined hour across concentrations (Figure S5). Samples were stained with  
371 propidium iodide to differentiate between life and dead cells and a small aliquot (5 ul) was added  
372 to a 0.01% poly-L-lysine coated slide to immobilize cells and immediately imaged to avoid  
373 changes in expression between sample acquisition and imaging in the dark on a Nikon Eclipse TI  
374 inverted microscope at 20x magnification. Live cell fluorescence microscopy was used for this  
375 study as fluorophores can be sensitive to fixation/permeabilization. These techniques can result  
376 in a decrease in fluorescence and therefore decrease in the observable dynamic range. Bright  
377 field, green fluorescence (20% Lumencor light engine power, 200ms exposure, and 64x gain-  
378 sufficient for imaging of low fluorescent cells without saturating pixel intensity), and red  
379 fluorescence (20% Lumencor light engine power, 800ms exposure, and 64x gain) channels were  
380 captured. Between 5,000 and 15,000 individual cells were captured for each sample. Aliquots  
381 were diluted immediately before imaging with carbonless minimal media when required to ensure  
382 an even distribution of cells.

383 **Single cell image analysis.** A custom macro in ImageJ was written to analyze the image,  
384 outlined in Figure S8. The macro uses ImageJ's "analyze particles" command to identify single  
385 cells on the bright field image. This then generates a ROI (region of interest) for each individual  
386 cell and these ROIs were then overlaid onto the corresponding fluorescent image. The red  
387 fluorescence channel was used to identify dead cells with compromised membranes, which were  
388 excluded from further analysis. The green fluorescence channel reflected the QS reporter and  
389 pixel intensity was measured as a proxy for level of QS response. This tabulated live cell

390 expression data was then analyzed using *Stata Statistical Software: Release 17* from StataCorp  
391 LLC. In order to improve the fit of the mixed models, the lowest pixel intensity measurement in the  
392 highest carbon PAO1  $\Delta las/\Delta rhII$  *PlasB::gfp(ASV)* treatment was subtracted from all pixel  
393 intensities so that expression started at 0.

394 **Statistical analysis summary.** The analysis was done using *Stata Statistical Software: Release*  
395 *17* from StataCorp LLC and the additional third party resources: (69–73). Each of the 39  
396 populations was fit to a finite mixture model of two Gamma distributions. The latent classes in the  
397 mixture model correspond to OFF and ON cells. Gamma distributions are preferred to Normal  
398 distributions as gene expression is strictly non-negative and necessarily right-skewed. The  
399 models provide maximum likelihood estimates of the proportion of cells in each latent class and  
400 the shape and scale parameters of the component Gamma distributions. Mean expression level  
401 for each distribution is the product of shape and scale parameters. Information criteria for  
402 aggregate mean expression level was also calculated using Stata.

403 **Quantifying Signal Concentration.** AHL signal concentration was estimated using S17-  
404 1 *Escherichia coli* containing either the p56536 or pSB1142 plasmids (74), which luminesce in  
405 response to short and long chain AHLs, respectively. Filtered culture supernatant was diluted  
406 1/100 in LB broth and mixed 1:1 with exponentially growing bioreporter strains at an  $OD_{600}$  of 0.1  
407 in LB broth. A calibration curve was generated by exposing the bioreporters to synthetic signal at  
408 various concentrations. Signal bioreporters were grown with diluted supernatant for 3 hours at  
409 37°C taking reads of optical density and luminescence every 30 min. Using the peak  
410 luminescence, a calibration curve was then fitted to calculate signal concentrations in experimental  
411 samples.

## 412 **Acknowledgments**

413 We thank Steve Diggle, Marvin Whitely, Kathleen O'Connor and members of the Center for  
414 Microbial Dynamics and Infection (CMDI) for valuable comments and discussion on this work. We  
415 thank Dr. Kasper Norskov Kragh for the *PlasB::gfp(ASV)* reporter construct. This research was  
416 supported by the National Science Foundation Graduate Research Fellowship Program under  
417 Grant No. DGE-1650044 and by The Simons Foundation Grant No. 396001.

418

## 419 **References**

- 420 1. S. T. Rutherford, B. L. Bassler, Bacterial quorum sensing: Its role in virulence and  
421 possibilities for its control. *Cold Spring Harb. Perspect. Med.* **2** (2012).
- 422 2. R. G. Abisado, S. Benomar, J. R. Klaus, A. A. Dandekar, J. R. Chandler, Bacterial  
423 Quorum Sensing and Microbial Community Interactions. *MBio* **9**, e02331-17 (2018).

- 424 3. M. Whiteley, S. P. Diggle, E. P. Greenberg, Progress in and promise of bacterial quorum  
425 sensing research. *Nature* **551**, 313–320 (2017).
- 426 4. M. B. Miller, B. L. Bassler, Quorum Sensing in Bacteria. *Annu. Rev. Microbiol.* **55**, 165–  
427 199 (2001).
- 428 5. R. Popat, D. M. Cornforth, L. McNally, S. P. Brown, Collective sensing and collective  
429 responses in quorum-sensing bacteria. *J. R. Soc. Interface* **12** (2015).
- 430 6. S. E. Darch, S. A. West, K. Winzer, S. P. Diggle, Density-dependent fitness benefits in  
431 quorum-sensing bacterial populations. *Proc. Natl. Acad. Sci.* **109**, 8259–8263 (2012).
- 432 7. R. J. Redfield, Is quorum sensing a side effect of diffusion sensing? *Trends Microbiol.* **10**,  
433 365–70 (2002).
- 434 8. B. A. Hense, *et al.*, Does efficiency sensing unify diffusion and quorum sensing? *Nat. Rev.*  
435 *Microbiol.* **5**, 230–239 (2007).
- 436 9. J. Q. Boedicker, M. E. Vincent, R. F. Ismagilov, Microfluidic Confinement of Single Cells of  
437 Bacteria in Small Volumes Initiates High-Density Behavior of Quorum Sensing and Growth  
438 and Reveals Its Variability. *Angew. Chemie Int. Ed.* **48**, 5908–5911 (2009).
- 439 10. D. M. Cornforth, *et al.*, Combinatorial quorum sensing allows bacteria to resolve their  
440 social and physical environment. *Proc. Natl. Acad. Sci. U. S. A.* **111**, 4280–4284 (2014).
- 441 11. R. C. Allen, L. McNally, R. Popat, S. P. Brown, Quorum sensing protects bacterial co-  
442 operation from exploitation by cheats. *ISME J.* **10**, 1706–1716 (2016).
- 443 12. A. Eldar, Social conflict drives the evolutionary divergence of quorum sensing. *Proc. Natl.*  
444 *Acad. Sci. U. S. A.* **108**, 13635–13640 (2011).
- 445 13. N. E. Smalley, D. An, M. R. Parsek, J. R. Chandler, A. A. Dandekar, Quorum Sensing  
446 Protects *Pseudomonas aeruginosa* against Cheating by Other Species in a Laboratory  
447 Coculture Model. *J. Bacteriol.* **197**, 3154 LP – 3159 (2015).
- 448 14. E. Even-Tov, *et al.*, Social Evolution Selects for Redundancy in Bacterial Quorum  
449 Sensing. *PLOS Biol.* **14**, e1002386 (2016).
- 450 15. E. T. Granato, R. Kümmerli, The path to re-evolve cooperation is constrained in  
451 *Pseudomonas aeruginosa*. *BMC Evol. Biol.* **17**, 214 (2017).
- 452 16. Ö. Özkaya, R. Balbontín, I. Gordo, K. B. Xavier, Cheating on Cheaters Stabilizes  
453 Cooperation in *Pseudomonas aeruginosa*. *Curr. Biol.* **28**, 2070-2080.e6 (2018).
- 454 17. R. Chen, E. Déziel, M. C. Groleau, A. L. Schaefer, E. P. Greenberg, Social cheating in a  
455 *Pseudomonas aeruginosa* quorum-sensing variant. *Proc. Natl. Acad. Sci. U. S. A.* **116**,  
456 7021–7026 (2019).
- 457 18. J. Gurney, S. Azimi, S. P. Brown, S. P. Diggle, Combinatorial quorum sensing in  
458 *Pseudomonas aeruginosa* allows for novel cheating strategies. *Microbiology*, micro000941  
459 (2020).
- 460 19. J. L. Connell, *et al.*, Probing prokaryotic social behaviors with bacterial “lobster traps.”  
461 *MBio* **1** (2010).
- 462 20. W. C. Fuqua, S. C. Winans, E. P. Greenberg, Quorum sensing in bacteria: The LuxR-LuxI  
463 family of cell density- responsive transcriptional regulators. *J. Bacteriol.* **176**, 269–275  
464 (1994).



- 465 21. J. Schluter, A. P. Schoech, K. R. Foster, S. Mitri, The Evolution of Quorum Sensing as a  
466 Mechanism to Infer Kinship. *PLOS Comput. Biol.* **12**, e1004848 (2016).
- 467 22. Y. Wang, J. B. Rattray, S. A. Thomas, J. Gurney, S. P. Brown, In silico bacteria evolve  
468 robust cooperation via complex quorum-sensing strategies. *Sci. Rep.* **10**, 1–10 (2020).
- 469 23. A. B. Goryachev, Understanding Bacterial Cell–Cell Communication with Computational  
470 Modeling. *Chem. Rev.* **111**, 238–250 (2011).
- 471 24. S. James, P. Nilsson, G. James, S. Kjelleberg, T. Fagerström, Luminescence control in  
472 the marine bacterium *Vibrio fischeri*: An analysis of the dynamics of lux regulation. *J. Mol.*  
473 *Biol.* **296**, 1127–1137 (2000).
- 474 25. Woltereck, Weitere experimentelle Untersuchungen über Artveränderung, speziell über  
475 das Wesen quantitativer Artunterschiede bei Daphniden. *Science (80- )*. **32**, 344–345  
476 (1910).
- 477 26. C. H. Waddington, Canalization of development and the inheritance of acquired  
478 characters. *Nature* **150**, 563–565 (1942).
- 479 27. C. Schlichting, M. Pigliucci, Phenotypic Evolution: A Reaction Norm Perspective (1998).
- 480 28. A. B. Paaby, N. D. Testa, “Developmental Plasticity and Evolution” in *Evolutionary*  
481 *Developmental Biology*, (Springer International Publishing, 2018), pp. 1–14.
- 482 29. R. L. Scholz, E. Peter Greenberg, Positive autoregulation of an Acyl- homoserine lactone  
483 quorum-sensing circuit synchronizes the population response. *MBio* **8** (2017).
- 484 30. B. B. Pradhan, S. Chatterjee, Reversible non-genetic phenotypic heterogeneity in bacterial  
485 quorum sensing. *Mol. Microbiol.* **92**, 557–569 (2014).
- 486 31. C. Anetzberger, T. Pirch, K. Jung, Heterogeneity in quorum sensing-regulated  
487 bioluminescence of *Vibrio harveyi*. *Mol. Microbiol.* **73**, 267–277 (2009).
- 488 32. P. D. Pérez, S. J. Hagen, Heterogeneous response to a quorum-sensing signal in the  
489 luminescence of individual *vibrio fischeri*. *PLoS One* **5** (2010).
- 490 33. J. Grote, D. Krysciak, W. R. Streit, Phenotypic heterogeneity, a phenomenon that may  
491 explain why quorum sensing does not always result in truly homogenous cell behavior.  
492 *Appl. Environ. Microbiol.* **81**, 5280–5289 (2015).
- 493 34. D. Garmyn, *et al.*, Evidence of autoinduction heterogeneity via expression of the agr  
494 system of *Listeria monocytogenes* at the single-cell level. *Appl. Environ. Microbiol.* **77**,  
495 6286–6289 (2011).
- 496 35. E. L. Haseltine, F. H. Arnold, Implications of rewiring bacterial quorum sensing. *Appl.*  
497 *Environ. Microbiol.* **74**, 437–445 (2008).
- 498 36. L. Plener, *et al.*, The Phosphorylation Flow of the *Vibrio harveyi* Quorum-Sensing  
499 Cascade Determines Levels of Phenotypic Heterogeneity in the Population. *J. Bacteriol.*  
500 **197**, 1747 (2015).
- 501 37. M. Hentzer, *et al.*, Inhibition of quorum sensing in *Pseudomonas aeruginosa* biofilm  
502 bacteria by a halogenated furanone compound. *Microbiology* **148**, 87–102 (2002).
- 503 38. K. P. Burnham, D. R. Anderson, K. P. Huyvaert, AIC model selection and multimodel  
504 inference in behavioral ecology: some background, observations, and comparisons.  
505 *Behav. Ecol. Sociobiol.* **2010 651 65**, 23–35 (2010).

- 506 39. J. A. Hartigan, P. M. Hartigan, The Dip Test of Unimodality.  
507 <https://doi.org/10.1214/aos/1176346577> **13**, 70–84 (1985).
- 508 40. S. PC, P. L, I. BH, Activation of the *Pseudomonas aeruginosa* lasI gene by LasR and the  
509 *Pseudomonas* autoinducer PAI: an autoinduction regulatory hierarchy. *J. Bacteriol.* **177**,  
510 654–659 (1995).
- 511 41. M. LM, W. M, Membrane vesicles traffic signals and facilitate group activities in a  
512 prokaryote. *Nature* **437**, 422–425 (2005).
- 513 42. K. Papenfort, B. L. Bassler, Quorum sensing signal–response systems in Gram-negative  
514 bacteria. *Nat. Rev. Microbiol.* 2016 149 **14**, 576–588 (2016).
- 515 43. L. J, Z. L, The hierarchy quorum sensing network in *Pseudomonas aeruginosa*. *Protein*  
516 *Cell* **6**, 26–41 (2015).
- 517 44. D. V, D. E, Revisiting the quorum-sensing hierarchy in *Pseudomonas aeruginosa*: the  
518 transcriptional regulator RhIR regulates LasR-specific factors. *Microbiology* **155**, 712–723  
519 (2009).
- 520 45. J. B. Feltner, *et al.*, LasR variant cystic fibrosis isolates reveal an adaptable quorum-  
521 sensing hierarchy in *Pseudomonas aeruginosa*. *MBio* **7** (2016).
- 522 46. S.-A. MP, *et al.*, Inactivation of the quorum-sensing transcriptional regulators LasR or  
523 RhIR does not suppress the expression of virulence factors and the virulence of  
524 *Pseudomonas aeruginosa* PAO1. *Microbiology* **165**, 425–432 (2019).
- 525 47. C. RL, *et al.*, RhIR-Regulated Acyl-Homoserine Lactone Quorum Sensing in a Cystic  
526 Fibrosis Isolate of *Pseudomonas aeruginosa*. *MBio* **11** (2020).
- 527 48. W. MK, *et al.*, Construction and analysis of luxCDABE-based plasmid sensors for  
528 investigating N-acyl homoserine lactone-mediated quorum sensing. *FEMS Microbiol. Lett.*  
529 **163**, 185–192 (1998).
- 530 49. , The evolutionary consequences of plasticity in host–pathogen interactions -  
531 ScienceDirect (November 10, 2019).
- 532 50. S. Via, *et al.*, Adaptive phenotypic plasticity: consensus and controversy. *Trends Ecol.*  
533 *Evol.* **10**, 212–217 (1995).
- 534 51. S. Heilmann, S. Krishna, B. Kerr, Why do bacteria regulate public goods by quorum  
535 sensing?-How the shapes of cost and benefit functions determine the form of optimal  
536 regulation. *Front. Microbiol.* **6** (2015).
- 537 52. P. Jayakumar, S. A. Thomas, S. P. Brown, R. Kümmerli, *Pseudomonas aeruginosa*  
538 reaches collective decisions via transient segregation of quorum sensing activities across  
539 cells. *bioRxiv*, 2021.03.22.436499 (2021).
- 540 53. S. E. Darch, *et al.*, Spatial determinants of quorum signaling in a *Pseudomonas*  
541 *aeruginosa* infection model. *Proc. Natl. Acad. Sci.* **115**, 4779–4784 (2018).
- 542 54. K. Fujimoto, S. Sawai, A Design Principle of Group-level Decision Making in Cell  
543 Populations. *PLoS Comput. Biol.* **9**, e1003110 (2013).
- 544 55. M. Ackermann, A functional perspective on phenotypic heterogeneity in microorganisms.  
545 *Nat. Rev. Microbiol.* 2015 138 **13**, 497–508 (2015).
- 546 56. J. L. Cherry, F. R. Adler, How to make a Biological Switch. *J. Theor. Biol.* **203**, 117–133

- 547 (2000).
- 548 57. M. Schuster, M. L. Urbanowski, E. P. Greenberg, Promoter specificity in *Pseudomonas*  
549 *aeruginosa* quorum sensing revealed by DNA binding of purified LasR. *Proc. Natl. Acad. Sci.* **101**, 15833–15839 (2004).  
550
- 551 58. A. Ochab-Marcinek, M. Tabaka, Bimodal gene expression in noncooperative regulatory  
552 systems. *Proc. Natl. Acad. Sci.* **107**, 22096–22101 (2010).
- 553 59. B. Mellbye, M. Schuster, Physiological framework for the regulation of quorum sensing-  
554 dependent public goods in *Pseudomonas aeruginosa*. *J. Bacteriol.* **196**, 1155–1164  
555 (2014).
- 556 60. S. P. Diggle, K. Winzer, A. Lazdunski, P. Williams, M. Cámara, Advancing the quorum in  
557 *Pseudomonas aeruginosa*: MvaT and the regulation of N-acylhomoserine lactone  
558 production and virulence gene expression. *J. Bacteriol.* **184**, 2576–2586 (2002).
- 559 61. S. A. Chugani, *et al.*, QscR, a modulator of quorum-sensing signal synthesis and virulence  
560 in *Pseudomonas aeruginosa*. *Proc. Natl. Acad. Sci. U. S. A.* **98**, 2752–2757 (2001).
- 561 62. M. J. Gambello, B. H. Iglewski, Cloning and characterization of the *Pseudomonas*  
562 *aeruginosa* lasR gene, a transcriptional activator of elastase expression. *J. Bacteriol.* **173**,  
563 3000 (1991).
- 564 63. J. P. Pearson, L. Passador, B. H. Iglewski, E. P. Greenberg, A second N-acylhomoserine  
565 lactone signal produced by *Pseudomonas aeruginosa*. *Proc. Natl. Acad. Sci.* **92**, 1490–  
566 1494 (1995).
- 567 64. B. JM, O. DE, Synthesis of multiple exoproducts in *Pseudomonas aeruginosa* is under the  
568 control of RhlR-RhlI, another set of regulators in strain PAO1 with homology to the  
569 autoinducer-responsive LuxR-LuxI family. *J. Bacteriol.* **177**, 7155–7163 (1995).
- 570 65. C. F, *et al.*, The LasB Elastase of *Pseudomonas aeruginosa* Acts in Concert with Alkaline  
571 Protease AprA To Prevent Flagellin-Mediated Immune Recognition. *Infect. Immun.* **84**,  
572 162–171 (2015).
- 573 66. C. Cigana, *et al.*, *Pseudomonas aeruginosa* Elastase Contributes to the Establishment of  
574 Chronic Lung Colonization and Modulates the Immune Response in a Murine Model.  
575 *Front. Microbiol.* **0**, 3443 (2021).
- 576 67. D. M. Cornforth, *et al.*, *Pseudomonas aeruginosa* transcriptome during human infection.  
577 *Proc. Natl. Acad. Sci.* **115**, E5125–E5134 (2018).
- 578 68. K. Winzer, P. Williams, Quorum sensing and the regulation of virulence gene expression  
579 in pathogenic bacteria. *Int. J. Med. Microbiol.* **291**, 131–143 (2001).
- 580 69. N. J. Cox, DIPTEST: Stata module to compute dip statistic to test for unimodality. *Stat.*  
581 *Softw. Components* (2016) (November 8, 2021).
- 582 70. N. J. Cox, S. P. Jenkins, GAMMAFIT: Stata module to fit a two-parameter gamma  
583 distribution. *Stat. Softw. Components* (2011) (November 8, 2021).
- 584 71. P. Deb, FMM: Stata module to estimate finite mixture models. *Stat. Softw. Components*  
585 (2012) (November 8, 2021).
- 586 72. B. Jann, PALETTES: Stata module to provide color palettes, symbol palettes, and line  
587 pattern palettes. *Stat. Softw. Components* (2020) (November 8, 2021).

- 588 73. B. Jann, COLRSPACE: Stata module providing a class-based color management system  
589 in Mata. *Stat. Softw. Components* (2020) (November 8, 2021).
- 590 74. M. K. Winson, *et al.*, Construction and analysis of luxCDABE -based plasmid sensors for  
591 investigating N -acyl homoserine lactone-mediated quorum sensing . *FEMS Microbiol.*  
592 *Lett.* **163**, 185–192 (1998).
- 593 75. J. Meisner, J. B. Goldberg, The Escherichia coli rhaSR-PrhaBAD inducible promoter  
594 system allows tightly controlled gene expression over a wide range in Pseudomonas  
595 aeruginosa. *Appl. Environ. Microbiol.* **82**, 6715–6727 (2016).
- 596 76. F. MP, *et al.*, A dual biosensor for 2-alkyl-4-quinolone quorum-sensing signal molecules.  
597 *Environ. Microbiol.* **9**, 2683–2693 (2007).
- 598 77. H. TT, K. AJ, B. A, S. HP, Integration-proficient plasmids for Pseudomonas aeruginosa:  
599 site-specific integration and use for engineering of reporter and expression strains.  
600 *Plasmid* **43**, 59–72 (2000).
- 601 78. N. Friedman, L. Cai, X. S. Xie, Linking Stochastic Dynamics to Population Distribution: An  
602 Analytical Framework of Gene Expression. *Phys. Rev. Lett.* **97**, 168302 (2006).
- 603 79. A. P. Dempster, N. M. Laird, D. B. Rubin, Maximum Likelihood from Incomplete Data via  
604 the EM Algorithm. *J. R. Stat. Soc. Ser. B* **39**, 1–38 (1977).
- 605 80. T. L. Bailey, C. Elkan, Fitting a mixture model by expectation maximization to discover  
606 motifs in biopolymers. *Proceedings. Int. Conf. Intell. Syst. Mol. Biol.* **2**, 28–36 (1994).
- 607 81. J. Abrevaya, W. Jiang, A Nonparametric Approach to Measuring and Testing Curvature. *J.*  
608 *Bus. Econ. Stat.* **23**, 1–19 (2005).
- 609 82. G. C. Chow, Tests of Equality Between Sets of Coefficients in Two Linear Regressions.  
610 *Econometrica* **28**, 591–605 (1960).
- 611
